# Supplementary material for: Genome-Wide Gene Expression Changes in the Normal-Appearing Airway during the Evolution of Smoking-Associated Lung Adenocarcinoma
Source: Oxford University Press journal article supplement (doi:10.1158/1940-6207.capr-17-0295), 2018-01-30
Supplement: 19406207capr170295-sup-189405_2_supp_data_4500743_p22gmj.xlsx [file 19406207capr170295-sup-189405_2_supp_data_4500743_p22gmj.xlsx]

## Sheet: Table S1
Table S1. Early efffcts of NNK exposure on the mouse airway transcriptome
Mouse genes down-regulated in response to NNK	Mouse genes up-regulated in response to NNK	Human orthologues of NNK down-regulated mouse genes	Human orthologues of NNK up-regulated mouse genes
1600029I14Rik	1600014C10Rik	C5orf49	C19orf12
1700001L19Rik	2310007B03Rik	C4orf22	C2orf54
1700007G11Rik	2310022A10Rik	C10orf53	C19orf47
1700024G13Rik	5430435G22Rik	CFAP161	RAB7B
1700026D08Rik	5730416F02Rik	C9orf9	C1orf106
1700026L06Rik	5730559C18Rik	C10orf107	C6orf141
1700040L02Rik	9130008F23Rik	CCDC190	C15orf52
1700084C01Rik	A430105I19Rik	C1orf189	C1orf116
1700094D03Rik	AA986860	C17orf58	CD300C
1810010H24Rik	AF251705	KIAA0825	IFI16
2210408I21Rik	AI607873	C16orf96	AATK
4930562C15Rik	AI661453	C11orf54	ABCG1
4931406C07Rik	Aatk	KIAA1324	ABHD12
4932411E22Rik	Abcg1	C20orf96	ABHD17C
5330413P13Rik	Abhd12	C10orf10	ABHD4
5330417C22Rik	Abhd17c	KIAA1324L	ABLIM1
6330419J24Rik	Abhd4	KIAA1107	ACSM3
6820408C15Rik	Ablim1	KIAA1161	ADAMTSL4
8430408G22Rik	Acp5	C16orf89	ADAP1
9330159M07Rik	Acsm3	ABCC4	ADCY3
9330182L06Rik	Adamtsl4	ABCC8	ADH7
9430037G07Rik	Adap1	ACE2	AGPAT4
9830166K06Rik	Adcy3	ACSS1	AIM1
A830010M20Rik	Adh7	ACSS2	AKAP12
AI463170	Agpat4	ACTN2	ALDH1A3
AI464131	Aim1	ADAM22	AMZ1
AU021092	Akap12	ADCY2	ANGPTL4
Abcc4	Aldh1a3	ADCYAP1R1	ANO9
Abcc8	Aldh3b2	ADGB	ANXA1
Ace2	Alox12e	ADHFE1	ANXA10
Acnat1	Amz1	AGBL4	APOBEC1
Acss1	Angptl4	AK7	APOBR
Acss2	Ano9	AK8	APRT
Actn2	Anxa1	AKAP14	AQP3
Adam22	Anxa10	ALDH6A1	AQP5
Adcy2	Apobec1	ANKRD33B	ARAP2
Adcyap1r1	Apobr	AOC1	ARG1
Adgb	Apol7a	AOX1	ARHGAP22
Adhfe1	Aprt	ARHGAP6	ARHGAP25
Agbl4	Aqp3	ARMC3	ARHGAP27
Ak7	Aqp5	AS3MT	ARHGAP30
Ak8	Arap2	ATP13A5	ARHGDIA
Akap14	Arg1	ATP2A3	ARHGDIB
Akr1c14	Arhgap22	ATP2C2	ARNTL2
Aldh1a7	Arhgap25	ATP6V1B1	ARPC4
Aldh6a1	Arhgap27	ATP6V1C2	ATP6V0A1
Ankfn1	Arhgap30	ATP8A1	ATP6V0D2
Ankrd33b	Arhgdia	B3GNT4	AXL
Aoc1	Arhgdib	KIAA1804	B3GNT3
Aox1	Arntl2	BBOX1	B4GALT5
Aox3	Arpc4	BBS2	BAG3
Arhgap6	Atp6v0a1	BBS9	BAIAP2L2
Arhgef38	Atp6v0d2	BEX1	BAK1
Armc3	Axl	BMP3	BARX2
As3mt	B3gnt3	BPIFA1	BAX
Atp13a5	B4galt5	BPIFB1	BCAR3
Atp2a3	Bag3	C1RL	BCL2L11
Atp2c2	Baiap2l2	C3	BMP6
Atp6v1b1	Bak1	CABLES1	BMX
Atp6v1c2	Barx2	CACNA1B	BNC1
Atp8a1	Bax	CACNA1D	BST1
B3gnt4	Bcar3	CADM1	BTK
BC021891	Bcl2l11	CADM2	KIAA1522
BC048507	Bmp6	CADPS2	CALML3
Bbox1	Bmx	CAPN13	CAPG
Bbs2	Bnc1	CA8	CAPN1
Bbs9	Bst1	CASC4	CAPN5
Bex2	Btbd3	CAT	CARD11
Bmp3	Btk	CBS	CCDC3
Bpifa1	C77080	CC2D2A	CCDC86
Bpifa5	Calml3	CCDC121	CD109
Bpifb1	Capg	CCDC129	CD300A
C1rl	Capn1	CCDC13	CD53
C3	Capn5	CCDC146	CD68
Cables1	Card11	CCDC154	CD80
Cacna1b	Ccdc3	CCDC170	CD81
Cacna1d	Ccdc86	BBOF1	CD84
Cadm1	Ccl6	CCKAR	CD93
Cadm2	Cd109	CCL28	CDC25B
Cadps2	Cd300a	CD36	CDC42EP2
Capn13	Cd53	CDH17	CDC42EP5
Car8	Cd68	CDH26	CDH3
Casc4	Cd80	CDHR3	CDKN1A
Cat	Cd81	CFAP221	CDKN2B
Cbs	Cd84	CFAP43	CDO1
Cc2d2a	Cd93	CFAP44	CEACAM1
Ccdc121	Cdc25b	CFAP52	CERK
Ccdc129	Cdc42ep2	CFAP57	CERS3
Ccdc13	Cdc42ep5	CFAP58	CHGB
Ccdc146	Cdh3	CFH	CIDEC
Ccdc154	Cdkn1a	CHAD	CLCA2
Ccdc170	Cdkn2b	CHCHD10	CLCN2
Ccdc176	Cdo1	CHCHD6	CLDN23
Ccdc30	Ceacam1	CHN1	CLDN4
Cckar	Cerk	CHPT1	CLDN7
Ccl28	Cers3	CLDN10	CLEC5A
Cd36	Ces1g	CLDN22	CLEC7A
Cdh17	Ces2c	CLIC6	CLIC3
Cdh26	Ces2f	CLSTN3	CMTM3
Cdhr3	Ces2g	COPZ2	CNPPD1
Cdkn1c	Chgb	CPQ	COL18A1
Cfap221	Chil3	CREB3L1	CORO1B
Cfap43	Cidec	CREB3L4	CORO1C
Cfap44	Clca2	CSRP2	CORO2A
Cfap52	Clca3b	CUX2	COTL1
Cfap57	Clcn2	CYFIP2	CPNE5
Cfap58	Cldn23	CYP2A13	CPT1C
Cfh	Cldn4	CYP4B1	CSF2RA
Chad	Cldn7	ARFGEF3	CSF2RB
Chchd10	Clec5a	KIAA0319	CSF2RB
Chchd6	Clec7a	C9orf152	CSNK1E
Chn1	Clic3	DCDC2	CTDNEP1
Chpt1	Cmtm3	DCDC2B	CTSC
Cldn10	Cnppd1	INTS6L	CTSD
Cldn22	Col17a1	DHDH	CTSS
Clic6	Col18a1	DIXDC1	CTSZ
Clstn3	Coro1b	DMKN	CTTNBP2NL
Copz2	Coro1c	DNAH1	CWH43
Cpq	Coro2a	DNAH11	CYBA
Creb3l1	Cotl1	DNAH5	CYBB
Creb3l4	Cpne5	DNAH6	CYP27A1
Csrp2	Cpt1c	DNAH7	CYTH3
Cux2	Csf2ra	DNAH7	SGK223
Cyfip2	Csf2rb	DNAH9	DAB2
Cyp2a5	Csf2rb2	DNAI1	DCAKD
Cyp4b1	Csnk1e	DNAJB13	DEF6
Cyp4b1-ps2	Ctdnep1	DNALI1	DENND2C
D10Bwg1379e	Ctsc	DPP6	DNASE2
D130043K22Rik	Ctsd	DTNA	DOCK10
D430036J16Rik	Ctss	DYNC2H1	DOCK2
D630039A03Rik	Ctsz	DYX1C1	DPEP2
Daw1	Cttnbp2nl	CCDC180	DSC2
Dcdc2a	Cwh43	EAF2	DSG3
Dcdc2b	Cyba	EFCAB1	DUOX2
Ddx26b	Cybb	EML5	DUSP10
Dhdh	Cyp27a1	ENO4	DYSF
Dixdc1	Cyth3	EPDR1	ECM1
Dmkn	D8Ertd82e	ERICH5	EFHD2
Dnah1	Dab2	ESRRG	EFNB1
Dnah11	Dcakd	EYA4	EHD2
Dnah5	Def6	FAM114A1	EIF4E3
Dnah6	Dennd2c	FAM151B	ELF4
Dnah7a	Dnase2a	FAM166B	ELK3
Dnah7b	Dock10	FAM179A	ADGRE1
Dnah9	Dock2	FAM184A	ENPP1
Dnaic1	Dpep2	FAM65B	EPHB3
Dnajb13	Dsc2	FBXL13	EPS8L1
Dnali1	Dsg3	FBXO27	EREG
Dpp6	Duox2	FBXO36	EVL
Dtna	Dusp10	FGFBP1	EVPL
Dync2h1	Dysf	FGFR1	FABP5
Dyx1c1	Ecm1	FHIT	FAIM2
E230008N13Rik	Efhd2	FMO1	FAM111A
Eaf2	Efnb1	FMO3	FAM20C
Efcab1	Ehd2	FN3K	FAM83G
Eml5	Eif4e3	FNDC5	FAM83H
Eno4	Elf4	FOCAD	FBP2
Epdr1	Elk3	FOXA2	FCER1G
Erich5	Emr1	FOXA3	FCGR2B
Esrrg	Enpp1	FSTL4	FCHO1
Eya4	Ephb3	FUT2	FERMT3
Fam114a1	Eps8l1	FUT9	FGR
Fam13a	Ereg	FZD4	FILIP1L
Fam151b	Evl	GALM	FJX1
Fam166b	Evpl	GALNTL6	FNIP2
Fam179a	Fabp5	GATA6	FOXQ1
Fam184a	Faim2	GDPD2	FRMD6
Fam65b	Fam111a	C1orf87	FRMD8
Fbxl13	Fam20c	KIAA2012	FSCN1
Fbxo27	Fam83g	UNC93A	FXYD5
Fbxo36	Fam83h	GNG7	G6PD
Fgfbp1	Fbp2	GPAM	GALNS
Fgfr1	Fcer1g	GRAMD1B	GAS7
Fhit	Fcgr2b	HID1	GBP2
Fmo1	Fcho1	HIGD1A	GCNT3
Fmo3	Fer1l4	HNMT	GLTP
Fn3k	Fermt3	HP	IFIT1
Fndc5	Fgr	HSPB6	GNA15
Focad	Filip1l	HYDIN	GNAI2
Foxa2	Fjx1	ICA1	GNGT2
Foxa3	Fmnl1	IGDCC4	GPNMB
Fstl4	Fnip2	IGSF11	GPR87
Fut2	Foxq1	IKBKG	GRHL3
Fut9	Frmd6	INHBB	GRIA3
Fzd4	Frmd8	INPP5J	GRN
Galm	Fscn1	INSIG1	GSDMD
Galntl6	Fxyd5	IQCA1	GTSE1
Gata6	G6pdx	IQCH	HCLS1
Gdpd2	Galns	IQUB	HEBP2
Gm11517	Gas7	ITIH2	HEXA
Gm12695	Gbp2	KCNJ11	HIP1
Gm15348	Gcnt3	KCNJ13	HLF
Gm3317	Ggta1	KCNMB2	HOPX
Gm3383	Gltp	KCTD8	HPGDS
Gm3488	Gm14446	KIF26B	HR
Gm6682	Gm20219	KLF15	HS6ST1
Gm973	Gm3219	LDHB	HVCN1
Gm9992	Gm9573	LDLRAD1	IER5L
Gng7	Gm9926	LGI1	IFI16
Gpam	Gna15	LGR6	IFI16
Gramd1b	Gnai2	LIMCH1	IGFBP3
Gstt1	Gngt2	LPAR3	IGSF6
Hid1	Gpnmb	LRRC43	IKZF3
Higd1a	Gpr87	LRRIQ1	IL17RA
Hnmt	Grhl3	LRRN3	IL1RN
Hp	Gria3	LURAP1	INCENP
Hspb6	Grn	LYST	INF2
Hydin	Gsdmd	MACROD1	IRAK4
Ica1	Gtse1	MAGED1	IRF5
Ifitm7	Hcls1	MAGIX	ITGA5
Igdcc4	Hebp2	MAP3K19	ITGAX
Igsf11	Hexa	MAT1A	ITGB2
Ikbkg	Hip1	MDM1	ITGB4
Inhbb	Hlf	MED12L	ITPKC
Inpp5j	Hopx	MEDAG	JDP2
Insig1	Hpgds	MEIG1	KANK1
Iqca	Hr	METRN	KANK3
Iqch	Hs6st1	MGST2	KCNK5
Iqub	Hvcn1	MIA	KCNK7
Itih2	Ier5l	MICAL2	KCTD12
Kcnj11	Ifi203	MLPH	KIF1C
Kcnj13	Ifi204	MORN1	KLHDC4
Kcnmb2	Igfbp3	MUC5B	KLHDC8A
Kctd8	Igsf6	MYO1H	KRT13
Kif26b	Ikzf3	NBAS	KRT14
Klf15	Il17ra	NEK5	KRT15
Ldhb	Il1rn	NEXN	KRT17
Ldlrad1	Incenp	NME9	KRT4
Lgi1	Inf2	NR1I2	KRT5
Lgr6	Irak4	NWD1	KRT6B
Limch1	Irf5	OSBPL6	KRT6B
Lpar3	Itga5	P2RX2	KRT7
Lrrc43	Itgax	P2RX4	KRT75
Lrrc74b	Itgb2	P2RX6	L1CAM
Lrriq1	Itgb4	PAM	LAD1
Lrrn3	Itpkc	PAPSS2	LAMA1
Lurap1	Jdp2	PARD3B	LAMB3
Lypd2	Kank1	PEG3	LAPTM5
Lyst	Kank3	PGM2L1	LGALS3
Macrod1	Kcnk5	PGM3	LGI2
Maged1	Kcnk7	PIFO	LHFPL2
Magix	Kctd12	PIGR	LILRA5
Map3k19	Kif1c	PLEKHB1	LIPA
Mat1a	Klhdc4	PLIN5	LMO1
Mdm1	Klhdc8a	PON1	LOXL4
Med12l	Krt13	PLPP3	LPCAT4
Medag	Krt14	PPIC	LPL
Meig1	Krt15	PPIL6	LRP1
Metrn	Krt17	PPP1R1B	LSR
Mettl7a3	Krt4	PPP1R36	LTBP4
Mgst2	Krt5	PPP1R9A	LY6D
Mia	Krt6a	PPP2R2B	LY6G6C
Mical2	Krt6b	PRKAR2B	LYPD3
Mlph	Krt7	PROC	MAL
Morn1	Krt75	PTGFR	MAN2B1
Muc5b	L1cam	PTPRM	MAP7D1
Myo1h	Lad1	PTPRN2	MAPK11
Nbas	Lama1	PXMP2	MARCKSL1
Nek5	Lamb3	PXYLP1	MB21D1
Nexn	Laptm5	RAB11FIP4	MERTK
Nme9	Lgals3	RD3	MGAT4A
Nr1i2	Lgi2	RFX3	MGLL
Nwd1	Lhfpl2	RGS13	MGMT
Osbpl6	Lilra5	RGS22	MID2
P2rx2	Lipa	RGS9	MKL1
P2rx4	Lmo1	RIC3	MKNK2
P2rx6	Loxl4	RNF150	MMP14
Pam	Lpcat4	RORA	MMP19
Papss2	Lpl	RP1	IFI16
Pard3b	Lrp1	RSPH14	IFI16
Pcp4l1	Lsr	RSPH4A	MPEG1
Peg3	Ltbp4	RUNDC3B	MPP1
Pgm2l1	Ly6d	SAMD4A	MPZL1
Pgm3	Ly6g6c	SCGB1A1	MRC1
Pifo	Ly6g6e	SCGB3A1	MSN
Pigr	Lypd3	SCGB3A2	MXD1
Plekhb1	Mal	SDC2	MYO1C
Plin5	Man2b1	SEC14L2	MYO1F
Pon1	Map7d1	SEC14L3	MYO5A
Ppap2b	Mapk11	SEC14L4	MYZAP
Ppic	Marcksl1	SERPINA9	N4BP3
Ppil6	Mb21d1	SERPINF1	NBEAL2
Ppp1r1b	Mertk	SFTPA1	NCF4
Ppp1r36	Mgat4a	SFTPB	NDRG2
Ppp1r9a	Mgll	SHANK2	NECAP2
Ppp2r2b	Mgmt	SLC15A2	NEU1
Prkar2b	Mid2	SLC25A23	NFATC2
Proc	Mkl1	SLC27A2	NFKB2
Ptgfr	Mknk2	SLC2A10	NGFR
Ptprm	Mmp14	SLC2A13	NLRX1
Ptprn2	Mmp19	SLC35G6	NOSIP
Pxmp2	Mnda	SLC38A1	NOTCH1
Pxylp1	Mndal	SLC4A5	NRP2
Rab11fip4	Mpeg1	SLC4A8	NUDT22
Rd3	Mpp1	SLC5A8	OASL
Rfx3	Mpzl1	SLC6A15	OLFM1
Rgs13	Mrc1	SLC7A4	OSR1
Rgs22	Msn	SLCO4C1	OVOL1
Rgs9	Mx1	SMIM1	PABPC4
Ric3	Mxd1	SMS	PAG1
Rnf150	Myo1c	SMTNL2	PAK6
Rora	Myo1f	SMYD3	PALM
Rp1	Myo5a	SNTB1	PAQR4
Rsph14	Myzap	SNTN	PAQR8
Rsph4a	N4bp3	SPAG16	PARD6G
Rundc3b	Nbeal2	SPAG17	PARP3
Samd4	Ncf4	SPATA17	PARVG
Scgb1a1	Ndrg2	SPATA33	PCDH1
Scgb3a1	Necap2	SPDEF	PCK2
Scgb3a2	Neu1	SPEF2	PCOLCE
Sdc2	Nfatc2	ST6GAL1	PDLIM2
Sec14l2	Nfkb2	STARD8	PDZD2
Sec14l3	Ngfr	STC2	PDZK1IP1
Sec14l4	Nlrx1	STEAP4	PHGDH
Serpina9	Nosip	STK33	PHLDA3
Serpinf1	Notch1	STMND1	PHLDB3
Sftpa1	Nrp2	STXBP6	PIEZO1
Sftpb	Nudt22	SUGCT	PIGA
Shank2	Oasl1	SULT1C3	PIK3AP1
Slc15a2	Olfm1	SYBU	PIK3R6
Slc25a23	Osr1	SYNE1	PIM1
Slc27a2	Ovol1	SYNGR1	LILRB3
Slc2a10	Pabpc4	SYT10	PITX1
Slc2a13	Pag1	SYTL3	PKMYT1
Slc35g3	Pak6	TACR1	PKN1
Slc38a1	Palm	TBATA	PKP1
Slc4a5	Paqr4	TBC1D30	PKP3
Slc4a8	Paqr8	TBC1D32	PLA2G15
Slc5a8	Pard6g	TC2N	PLAC8
Slc6a15	Parp3	TEKT2	PLAT
Slc7a4	Parvg	TEKT3	PLCB2
Slco4c1	Pcdh1	TENM4	PLCD1
Smim1	Pck2	THNSL2	PLCD3
Sms	Pcolce	THRB	PLCL2
Smtnl2	Pdlim2	TMEM150C	PLD3
Smyd3	Pdzd2	TMEM232	PLD4
Sntb1	Pdzk1ip1	TMEM37	PLEKHM1
Sntn	Perm1	TNFRSF19	PLEKHM2
Spag16	Phgdh	TF	PLEKHN1
Spag17	Phlda3	TRPM5	PLEKHO2
Spag6	Phldb3	TSGA10	PLSCR3
Spata17	Piezo1	TSPAN13	PMM1
Spata33	Piga	TSTD1	PMP22
Spdef	Pik3ap1	TTC21A	PNPLA7
Spef2	Pik3r6	TTC29	PLPP2
St6gal1	Pim1	TTC30B	PPARD
Stard8	Pira6	TTC32	PPFIA3
Stc2	Pirb	TTLL7	PPL
Steap4	Pitpnc1	TXNRD3	PPP1R13L
Stk33	Pitx1	TYRO3	PPP1R14B
Stmnd1	Pkmyt1	UGT8	PPP1R18
Stxbp6	Pkn1	ULK4	PREX1
Sugct	Pkp1	UNC79	PRKCH
Sult1c1	Pkp3	VPREB3	PSAP
Sybu	Pla2g15	WDPCP	PSAPL1
Syne1	Plac8	WDR19	PSD4
Syngr1	Plat	WDR27	PSRC1
Syt10	Plcb2	WDR38	PTK2B
Sytl3	Plcd1	WDR63	PTP4A3
Tacr1	Plcd3	WDR93	PTPRE
Tbata	Plcl2	ZFHX4	NECTIN1
Tbc1d30	Pld3	ZMYND12	PYCARD
Tbc1d32	Pld4		RAB11FIP1
Tc2n	Plekhm1		RAB27A
Tekt2	Plekhm2		RALBP1
Tekt3	Plekhn1		RAP2B
Tenm4	Plekho2		RASA4
Thnsl2	Plscr3		RASSF5
Thrb	Pmaip1		RBP1
Tmem150c	Pmm1		RELA
Tmem232	Pmp22		RERG
Tmem37	Pnpla7		RFTN1
Tnfrsf19	Ppap2c		RHOG
Trf	Ppard		RIN3
Trpm5	Ppfia3		RNASEL
Tsga10	Ppl		RNF144B
Tspan13	Ppp1r13l		RNF39
Tstd1	Ppp1r14b		RPS6KA4
Ttc21a	Ppp1r18		S100A14
Ttc29	Prex1		S100G
Ttc30b	Prkch		S1PR2
Ttc32	Prss32		SAMD14
Ttll7	Psap		SAMHD1
Txnrd3	Psapl1		SCEL
Tyro3	Psd4		SCPEP1
Ugt8a	Psrc1		SDC3
Ulk4	Ptk2b		SELPLG
Unc79	Ptp4a3		SEMA4A
Vpreb3	Ptpre		SERPINB10
Wdpcp	Pvrl1		SERPINB2
Wdr19	Pycard		SERPINB5
Wdr27	Rab11fip1		SERPINB8
Wdr38	Rab27a		SERPINE1
Wdr63	Ralbp1		SESN2
Wdr93	Rap2b		SFN
Zfhx4	Rasa4		SH2D1B
Zmynd12	Rassf5		SH3BP2
	Rbp1		SH3PXD2A
	Rela		SH3PXD2B
	Rerg		SIDT2
	Rftn1		SIGLEC1
	Rhog		SIRPA
	Rin3		SLA
	Rnasel		SLC15A3
	Rnf144b		SLC23A3
	Rnf39		SLC25A24
	Rplp2-ps1		SLC27A3
	Rps6ka4		SLC2A9
	S100a14		SLC38A7
	S100g		SLC52A3
	S1pr2		SLC9A4
	Samd14		SLCO2A1
	Samhd1		SNRK
	Scel		SOX15
	Scpep1		SP6
	Sdc3		SPHK1
	Sectm1b		SPINK5
	Selplg		SPNS2
	Sema4a		SRD5A1
	5-Sep		ST3GAL4
	Serpinb10		STK39
	Serpinb2		STON1
	Serpinb5		SULF2
	Serpinb8		SULT2B1
	Serpine1		SUOX
	Sesn2		SYK
	Sfn		SYN2
	Sh2d1b1		SYT8
	Sh3bp2		TACSTD2
	Sh3pxd2a		TAOK3
	Sh3pxd2b		TAPBP
	Sidt2		TBC1D10B
	Siglec1		TBC1D2
	Sirpa		TBC1D24
	Sla		TBX2
	Slc15a3		TGFB1
	Slc23a3		TGFBI
	Slc25a24		TGM1
	Slc27a3		TGM2
	Slc2a9		TGM4
	Slc38a7		TIFAB
	Slc52a3		TLR2
	Slc9a4		TLR7
	Slco2a1		TMBIM1
	Snrk		TMEM140
	Sox15		TMEM229B
	Sp6		TMEM40
	Sphk1		TMEM43
	Spink5		TMPRSS4
	Spns2		TNNI2
	Srd5a1		TNS1
	St3gal4		TPCN2
	Stk39		TRADD
	Ston1		TRERF1
	Sulf2		TREX2
	Sult2b1		TRIM16
	Suox		TRIM29
	Syk		TP53
	Syn2		TP53INP2
	Syt8		TRPM6
	Tacstd2		TSC22D4
	Taok3		TSPAN15
	Tapbp		TSPAN5
	Tbc1d10b		TTC7B
	Tbc1d2		TTLL12
	Tbc1d24		TTYH2
	Tbx2		TTYH3
	Tgfb1		TYROBP
	Tgfbi		UNC5A
	Tgm1		UNC5B
	Tgm2		UPK1B
	Tgm4		UPK3BL
	Tifab		VAT1
	Tlr13		VAV3
	Tlr2		VGLL3
	Tlr7		VIM
	Tmbim1		VPS18
	Tmem140		VWF
	Tmem229b		WAS
	Tmem40		WNT10A
	Tmem43		WNT4
	Tmprss11g		WNT7B
	Tmprss4		XDH
	Tnfrsf23		YBX3
	Tnni2		ZC3H12D
	Tns1		ZEB2
	Tpcn2		ZNF219
	Tpm2		ZNF362
	Tradd		ZNF385A
	Trerf1		ZFP92
	Trex2		ZMAT3
	Trim16
	Trim29
	Trp53
	Trp53inp2
	Trpm6
	Tsc22d4
	Tspan15
	Tspan5
	Ttc7b
	Ttll12
	Ttyh2
	Ttyh3
	Tyrobp
	Ugt1a7c
	Unc5a
	Unc5b
	Upk1b
	Upk3bl
	Vat1
	Vav3
	Vgll3
	Vim
	Vps18
	Vwf
	Was
	Wnt10a
	Wnt4
	Wnt7b
	Xdh
	Ybx3
	Zc3h12d
	Zeb2
	Zfp185
	Zfp219
	Zfp362
	Zfp385a
	Zfp92
	Zmat3

## Sheet: Table S2
Table S2. Evolutionarily conserved decreased gene expression in the airway following NNK exposure
Enriched genes down-regulated in airways of human smokers
STC2
IQCA1
SLC7A4
LYST
STEAP4
HP
MACROD1
LGI1
RGS9
CCDC170
SYNE1
DNAH7
NR1I2
AOX1
SNTB1
LPAR3
ADCYAP1R1
SLC6A15
TACR1
SYNGR1
KCNMB2
ESRRG
ARHGAP6
PPP1R9A
DNAH9
SHANK2
INPP5J
DPP6
BBOX1
MORN1
C10orf10
PAPSS2
MAT1A
FZD4
PTGFR
ATP8A1
CACNA1B
CA8
CYFIP2
INHBB
METRN
UGT8
HNMT
TEKT2
ATP6V1B1
BPIFA1
PTPRM
ADCY2
CYP2A13
FOXA2
SCGB1A1
SEC14L3
C3
MUC5B

## Sheet: Table S3
Table S3. Genes differentially regulated in the mouse airway at the indicated timepoints post NNK exposure
T2 v/s T0		T4 v/s T0		T6 v/s T0
down	up	down	up	down	up
4632428N05Rik	1110017D15Rik	1600014C10Rik	1600029I14Rik	Akr1c18	1110017D15Rik
AF251705	1600029I14Rik	4632428N05Rik	1700001L19Rik	Axl	1110032A03Rik
AI607873	1700003E16Rik	4833423E24Rik	1700003M02Rik	Bak1	1110051M20Rik
Abca1	1700007G11Rik	5730559C18Rik	1700007G11Rik	Cd68	1600029I14Rik
Acaa1b	1700007K13Rik	AA986860	1700007K13Rik	Cd80	1700001C02Rik
Akap12	1700019L03Rik	AF251705	1700016K19Rik	Cdca2	1700001L19Rik
Akr1c18	1700026D08Rik	Aaas	1700019L03Rik	Cdh3	1700003E16Rik
Aldh1a3	1700026L06Rik	Abca1	1700023E05Rik	Cdkn1a	1700003M02Rik
Arg1	1700030J22Rik	Abcc3	1700024G13Rik	Cers3	1700007G11Rik
Arhgdib	1700088E04Rik	Abcg1	1700026L06Rik	Ces2f	1700007K13Rik
Axl	1700094D03Rik	Abhd12	1700028P14Rik	Csf2rb	1700013F07Rik
Capg	1700101E01Rik	Abhd17c	1700030J22Rik	Csf2rb2	1700016K19Rik
Capn5	2310034G01Rik	Ablim1	1700088E04Rik	Ctsc	1700019L03Rik
Cd53	4430402I18Rik	Acaa1b	1700094D03Rik	Cybb	1700023E05Rik
Cd68	4930562C15Rik	Acp5	1700101E01Rik	Evpl	1700023L04Rik
Ces2c	4932411E22Rik	Acsm1	1810020O05Rik	Faim2	1700024G13Rik
Ces2e	4932418E24Rik	Adap1	2310007L24Rik	Fam111a	1700026D08Rik
Ces2f	5330413P13Rik	Adcy3	2310034G01Rik	Fgr	1700026L06Rik
Cpt1c	5830428M24Rik	Adh1	2410004P03Rik	Fscn1	1700028P14Rik
Ctss	9830166K06Rik	Adh7	4430402I18Rik	Fxyd5	1700030J22Rik
Cwh43	AK129341	Aim1	4930562C15Rik	Gm14446	1700037C18Rik
Cyp27a1	AU021092	Akap12	4932411E22Rik	Gm9573	1700040L02Rik
Def6	Abcc8	Akr1c18	4932418E24Rik	Gna15	1700084C01Rik
Dnase2a	Abhd3	Aldh1a3	4932443I19Rik	Gpnmb	1700088E04Rik
Evpl	Adcy2	Aldh1b1	5330413P13Rik	Gria3	1700094D03Rik
Faim2	Adgb	Aldh3a1	6820408C15Rik	Gtse1	1700101E01Rik
Fer1l4	Agbl4	Aldh3b2	9830166K06Rik	Inf2	1810020O05Rik
Fxyd5	Ak7	Angptl4	A830018L16Rik	Itgb2	1810043G02Rik
Gbp2	Ak8	Ank2	AK129341	Kctd12	2010204K13Rik
Gm14446	Akap14	Ano9	AU021092	Krt4	2010300C02Rik
Gm9573	Aldoc	Apex1	Abcc8	Krt6a	2210408I21Rik
Gna15	Ankfn1	Apobec1	Acox2	Krt6b	2310007L24Rik
Gngt2	Ankmy1	Apobr	Adam22	Lama1	2310034G01Rik
Gria3	Ankrd66	Aqp3	Adam8	Laptm5	2410004P03Rik
Hip1	Aoc1	Aqp5	Adgb	Lipa	2410089E03Rik
Homer3	Arhgdig	Arap2	Agbl4	Lrp1	2610028H24Rik
Ifi204	Armc2	Arg1	Ak7	Myo1f	2610301B20Rik
Ifit2	Armc3	Arhgap22	Ak8	Nbeal2	2810029C07Rik
Igsf6	Asb14	Arhgdib	Akap6	Nrp2	4430402I18Rik
Il18	Asns	Arhgef18	Amy1	Oasl1	4833427G06Rik
Il1rn	Atp6v0a4	Arhgef40	Ankfn1	Pcdh19	4930402H24Rik
Kctd12	Atp6v1b1	Arpc1b	Ankmy1	Phlda3	4930444P10Rik
Krt15	Atp6v1c2	Atp6v0d2	Ankrd66	Piga	4930505A04Rik
Krt4	Atp7b	Axl	Aoc1	Pik3r5	4930562C15Rik
Lama1	Atp8a1	B3galt5	Arhgdig	Plcb2	4930572O03Rik
Lrp1	B3gnt4	BC016579	Armc2	Pld4	4931406C07Rik
Mmp14	BC048546	BC055324	Armc3	Prss32	4931429I11Rik
Muc20	BC051019	Bak1	Asb14	Psrc1	4932411E22Rik
Nbeal2	Barhl1	Bax	Atp6v1b1	Rftn1	4932418E24Rik
Pabpc1	Bbox1	Birc5	Atp6v1c2	Rnf144b	4932443I19Rik
Piga	Bok	Bub1b	B3gnt4	Samhd1	5330413P13Rik
Pira6	Bpifa1	C030006K11Rik	BC021891	Sesn2	5430425K12Rik
Pmaip1	Bpifa5	Calml3	BC048546	Slfn2	5830428M24Rik
Ppp1r18	Bpifb1	Capg	BC051019	St3gal4	6820408C15Rik
Prkch	C530005A16Rik	Capn5	Barhl1	Sulf2	9230110C19Rik
Prss32	Cacna1h	Card11	Bbox1	Tgfb1	9530077C05Rik
Psrc1	Cadm2	Casp8	Bok	Tlr13	9830166K06Rik
Rbp1	Catip	Ccdc3	Bpifa1	Tnfrsf1b	A630023A22Rik
Rnasel	Cbs	Ccng1	Bzrap1	Trim29	A830010M20Rik
Sesn2	Ccdc108	Ccrl2	Cacna1h	Ttyh2	A830018L16Rik
Slc9a4	Ccdc114	Cd14	Cald1	Ugt1a7c	AI317395
Tbrg3	Ccdc13	Cd33	Calml4	Upk1b	AI463170
Tgfbi	Ccdc146	Cd53	Casc1	Vat1	AI467606
Tgm2	Ccdc17	Cd68	Catip	Zmat3	AK129341
Trim29	Ccdc24	Cd80	Cbs		AU021092
Ugt1a7c	Ccdc30	Cd81	Ccdc108		AU022754
Upk1b	Ccdc33	Cdc20	Ccdc114		AU040972
Zfp185	Ccdc37	Cdc25b	Ccdc13		Aacs
	Ccdc40	Cdc42ep2	Ccdc146		Abca13
	Ccdc42b	Cdca2	Ccdc157		Abcc8
	Ccdc60	Cdh3	Ccdc162		Abhd3
	Ccdc78	Cdkn1a	Ccdc17		Acox2
	Cdh26	Cdkn2b	Ccdc170		Acsl3
	Cdhr3	Cdo1	Ccdc24		Acss2
	Cdkl4	Cdt1	Ccdc30		Adam22
	Cerkl	Cerk	Ccdc33		Adam8
	Ces1f	Cers3	Ccdc37		Adamts20
	Cfap126	Ces1d	Ccdc40		Adcy2
	Cfap221	Ces2c	Ccdc42b		Adgb
	Cfap44	Ces2e	Ccdc60		Adhfe1
	Cfap45	Ces2f	Ccdc65		Adprm
	Cfap46	Ces2g	Ccdc74a		Aff3
	Cfap52	Chaf1b	Ccdc78		Agbl2
	Cfap57	Chp1	Cdh26		Agbl4
	Cfap58	Chst15	Cdhr3		Agr3
	Cfap69	Chst7	Cdkl1		Aig1
	Cfap70	Clcn2	Cdkl4		Ak7
	Cfap74	Cldn23	Ces1f		Ak8
	Chia1	Cmc2	Cfap126		Akap14
	Ckb	Cndp2	Cfap221		Akap6
	Clca1	Col17a1	Cfap43		Akap9
	Cldn22	Col1a1	Cfap44		Aldh3b1
	Clic6	Colec12	Cfap45		Aldh5a1
	Col27a1	Colgalt1	Cfap46		Aldoc
	Cp	Commd3	Cfap52		Amy1
	Creb3l1	Coro1b	Cfap57		Ang
	Cux2	Cotl1	Cfap58		Angptl2
	Cyp2s1	Cpne5	Cfap69		Ank3
	Cyp4b1	Cpt1c	Cfap70		Ankef1
	D130043K22Rik	Crlf1	Cfap74		Ankfn1
	D430036J16Rik	Cryl1	Chchd10		Ankmy1
	Daw1	Csf2rb	Chchd6		Ankrd32
	Dcdc2a	Csf2rb2	Chia1		Ankrd33b
	Diras2	Cstb	Clic6		Ankrd42
	Dlec1	Ctsb	Col27a1		Ankrd44
	Dmbt1	Ctsc	Cp		Ankrd45
	Dmkn	Ctsd	Cux2		Ankrd66
	Dmwd	Ctss	Cyp2s1		Ankub1
	Dnaaf1	Ctsz	D130043K22Rik		Antxr2
	Dnaaf3	Cwh43	D430036J16Rik		Aoc1
	Dnah1	Cybb	Daw1		Aox3
	Dnah10	Cyp27a1	Diras2		Appl2
	Dnah11	Cyp3a13	Dlec1		Arhgap18
	Dnah2	Cyth3	Dmkn		Arhgap39
	Dnah5	Dap	Dnaaf1		Arhgdig
	Dnah6	Dapl1	Dnaaf3		Arhgef28
	Dnah9	Ddx58	Dnah1		Arhgef33
	Dnaic1	Def6	Dnah10		Arhgef38
	Dnaic2	Dennd2c	Dnah11		Arl3
	Dnali1	Dera	Dnah2		Arl4a
	Dpp6	Dgka	Dnah5		Arl6
	Drc1	Dhrs1	Dnah6		Armc2
	Drc7	Dnase2a	Dnah7a		Armc3
	Dthd1	Dock2	Dnah9		Armc4
	Dtx1	Dut	Dnaic1		Asb14
	Dusp18	Ecm1	Dnaic2		Asns
	Dync2h1	Edaradd	Dnajb13		Atp5s
	E230008N13Rik	Eef2	Dnali1		Atp6v0a4
	Endog	Efnb1	Drc1		Atp6v1b1
	Enkur	Efs	Drc7		Atp6v1c2
	Eno4	Ehd2	Dtx1		Atp7b
	Fads3	Eif4ebp2	Dydc1		Atp8a1
	Fam107a	Elk3	Dync2h1		Atp8b5
	Fam149a	Eln	Dynlrb2		Azin2
	Fam166b	Emilin1	E230008N13Rik		B3galt2
	Fam167a	Emp2	Efcab6		B3gnt4
	Fam171a1	Emr1	Elmod1		B4galt4
	Fam179a	Enc1	Endog		BC021891
	Fam216b	Enpp1	Enkur		BC048546
	Fam47e	Epha4	Eno4		BC051019
	Fbxl13	Ephb3	Erich3		BC051628
	Fbxo36	Ephb6	Fads3		Bambi
	Fhit	Ephx1	Fam107a		Barhl1
	Fhl1	Ermp1	Fam159a		Bbox1
	Fsd1l	Esd	Fam166b		Bbs1
	Fstl4	Evi2a	Fam167a		Bbs12
	Fzd4	Evl	Fam179a		Bbs2
	Gas2l2	Evpl	Fam216b		Bbs4
	Glb1l2	Fabp5	Fam227a		Bbs5
	Gm11517	Faim2	Fam47e		Bbs7
	Gm11992	Fam111a	Fam92b		Bbs9
	Gm12695	Fam134c	Fbxl13		Bcas1
	Gm3317	Fam198b	Fbxl2		Bdkrb1
	Gm3488	Fam49a	Fbxo36		Bnip3
	Gnaz	Fat2	Fhad1		Bok
	Gpr125	Fcer1g	Fhit		Bphl
	Gpr98	Fer1l4	Fhl1		Bpifa1
	Hey1	Fermt3	Fndc5		Bpifb1
	Hp	Fgr	Foxj1		Bzrap1
	Hspa2	Fnip2	Fsd1l		C1rl
	Hspa4l	Foxm1	Gas2l2		C530005A16Rik
	Hydin	Frat1	Gfpt2		C920006O11Rik
	Igsf11	Frmd4a	Glb1l2		Cables1
	Iqca	Fscn1	Gm12695		Cacna1a
	Iqcg	Fth1	Gm16130		Cacna1b
	Iqch	Fxyd5	Gm1661		Cacna1d
	Iqck	Fzd10	Gm17019		Cacna1h
	Iqub	G6pdx	Gm867		Cadm2
	Itpka	Gabrp	Gm973		Calcoco2
	Kcnh3	Galns	Gm9758		Cald1
	Kcnj11	Gas7	Gpr98		Calm1
	Kcnj15	Gbp2	Gprc5c		Calml4
	Kcnq1	Gbp7	Grb14		Camk2n1
	Kif19a	Gga2	Hhatl		Caps2
	Kif26b	Ggta1	Hp		Capsl
	Kif6	Ghdc	Hspa2		Car8
	Klk11	Gla	Hydin		Casc1
	Kndc1	Gltp	Iqca		Cat
	Ky	Glul	Iqcd		Catip
	Lbh	Gm14446	Iqch		Cbs
	Ldlrad1	Gm9573	Iqub		Cc2d2a
	Lgr6	Gna15	Itpka		Ccbl2
	Lhb	Gnb2l1	Kcnh3		Ccdc103
	Lrguk	Gngt2	Kcnj11		Ccdc108
	Lrrc10b	Gpnmb	Kcnmb2		Ccdc113
	Lrrc18	Gpr126	Kif19a		Ccdc114
	Lrrc23	Gpr87	Kif26b		Ccdc121
	Lrrc34	Gprc5b	Kif6		Ccdc13
	Lrrc36	Gpsm2	Kif9		Ccdc138
	Lrrc43	Gpt	Klk11		Ccdc146
	Lrrc46	Grhl1	Klrg2		Ccdc148
	Lrrc48	Grhl3	Kndc1		Ccdc150
	Lrrc56	Gria3	Ky		Ccdc151
	Lrrc71	Grn	Ldlrad1		Ccdc154
	Mak	Gsdmd	Lgr6		Ccdc157
	Mapk15	Gsta4	Lhb		Ccdc160
	Mdh1b	Gsto1	Lrguk		Ccdc162
	Mfsd6l	Gtse1	Lrrc10b		Ccdc17
	Morn1	H2-T22	Lrrc34		Ccdc170
	Nek10	Hadha	Lrrc36		Ccdc171
	Neurl1a	Hck	Lrrc43		Ccdc176
	Nhlrc4	Hebp2	Lrrc46		Ccdc181
	Nme9	Helb	Lrrc48		Ccdc24
	Nphp4	Hexa	Lrrc71		Ccdc30
	Nwd1	Hilpda	Lrrc74b		Ccdc33
	Odf3b	Hlf	Mak		Ccdc37
	Olig3	Hn1	Map1b		Ccdc39
	P2rx6	Hopx	Map3k19		Ccdc40
	Pacrg	Hr	Mapk15		Ccdc42b
	Pdia2	Hvcn1	Mcf2l		Ccdc57
	Plekhb1	Ifi204	Meig1		Ccdc60
	Plin5	Ifi27l2a	Mlf1		Ccdc62
	Pltp	Ifit2	Morn1		Ccdc65
	Pon1	Ikzf3	Morn3		Ccdc74a
	Porcn	Il17ra	Mycbpap		Ccdc78
	Ppp1r36	Il18bp	Myo1h		Ccdc81
	Prr18	Il1rn	Nek10		Ccdc87
	Prrg3	Incenp	Nek5		Ccdc89
	Psmc3ip	Inf2	Neurl1a		Ccdc96
	Ptprz1	Iqgap3	Nhlrc4		Cckar
	Pxmp2	Irak4	Nme5		Ccl28
	Rfx3	Irf5	Nme9		Ccnc
	Rgs11	Irf7	Nphp4		Ccp110
	Rgs14	Itgb2	Nwd1		Ccpg1os
	Rgs22	Itpr2	Odf3b		Cd24a
	Rp1	Jdp2	Olig3		Cd97
	Rsph14	Kank3	P2rx6		Cdc14a
	Rsph4a	Kctd12	Pacrg		Cdh26
	Samd4	Kif1c	Pcp4l1		Cdhr1
	Scgb1a1	Kif4	Pcsk4		Cdhr3
	Scgb3a1	Klhdc4	Pdia2		Cdk20
	Sco2	Klhdc8a	Pifo		Cdkl1
	Sec14l3	Krt13	Plekhb1		Cdkl2
	Sec14l4	Krt15	Plin5		Cdkl4
	Serpinb12	Krt23	Pltp		Cdpf1
	Sftpa1	Krt4	Ppil6		Cds1
	Sftpb	Krt5	Ppp1r32		Cenpv
	Sftpc	Krt6b	Ppp1r36		Cep290
	Shank2	L1cam	Ptprz1		Cep41
	Slc1a4	L3mbtl3	Rasl10b		Cep70
	Slc23a1	Lama1	Rd3		Cep83
	Slc24a3	Lamb3	Rgs11		Cerkl
	Slc2a12	Laptm5	Rgs22		Ces1f
	Slc4a5	Lcp1	Riiad1		Cetn2
	Slc4a8	Lhfpl1	Rp1		Cetn4
	Slc5a8	Lhfpl2	Rsph14		Cfap126
	Slc7a4	Lilra5	Rsph4a		Cfap20
	Sntn	Lipa	Samd4		Cfap221
	Spag16	Lpl	Scgb1a1		Cfap43
	Spag17	Lrp1	Scgb3a1		Cfap44
	Spag6	Ltbp4	Sco2		Cfap45
	Spag8	Ly6d	Scrn1		Cfap46
	Spata17	Ly6g6c	Sec14l2		Cfap52
	Spata18	Ly6g6e	Sec14l3		Cfap57
	St8sia2	Mal	Sec14l4		Cfap58
	Stk33	Maml1	Serpinb12		Cfap61
	Stmnd1	Man2b1	Sftpb		Cfap69
	Syne1	Marcksl1	Shank2		Cfap70
	Syt5	Mcm3	Slc1a4		Cfap74
	Tbata	Mcm5	Slc23a1		Cfh
	Tekt3	Mdfic	Slc2a12		Chchd10
	Tenm4	Mertk	Slc4a8		Chchd2
	Tex9	Mgmt	Slc5a8		Chchd6
	Timp3	Mical1	Smim5		Chia1
	Timp4	Mid2	Sntn		Chn2
	Tll1	Mki67	Spag16		Chpt1
	Tm4sf1	Mknk2	Spag17		Chuk
	Tm6sf2	Mmp14	Spag6		Cidea
	Tmem213	Mpeg1	Spag8		Cldn22
	Tmem232	Mpzl1	Spata17		Clic6
	Tmem37	Msn	Spata18		Cmtm8
	Tpsb2	Muc20	Spef2		Cmya5
	Trp73	Mylip	Sqle		Cnot10
	Tspyl5	Myo1f	St8sia2		Col27a1
	Ttc16	Myo5a	Stmnd1		Cp
	Ttc21a	Myzap	Sult1c1		Cpvl
	Ttc29	Nbeal2	Syne1		Creb3l1
	Ttc34	Ncapg	Syngap1		Creb3l4
	Tuba1a	Ncf1	Syt5		Crip3
	Tymp	Ncf2	T2		Crnde
	Ubxn10	Nckap5l	Tacr1		Cry2
	Ubxn11	Nde1	Tbata		Ctxn1
	Ulk4	Ndrg2	Tcp11		Cux2
	Vwa3a	Notch1	Tekt3		Cyfip2
	Wdr27	Nrep	Tenm4		Cyp2s1
	Wdr38	Nrp1	Tex9		Cyp4b1
	Wdr54	Nrp2	Timp4		Cyp51
	Wdr63	Nudt19	Tm4sf1		D130043K22Rik
	Wdr78	Nudt22	Tmem232		D1Ertd622e
	Wdr95	Oasl1	Tmem37		D3Ertd751e
	Wnt11	Oit1	Tnni3		D430036J16Rik
	Wnt5b	Osr1	Trp73		D430042O09Rik
	Xylb	Pabpc1	Tsnaxip1		D630024D03Rik
	Zmynd10	Padi1	Ttc12		Daw1
		Pag1	Ttc21a		Dbndd1
		Pak3	Ttc29		Dbp
		Paqr8	Ttc34		Dcdc2a
		Pard6g	Ttll6		Dcdc2b
		Parvg	Ttll8		Ddo
		Pcolce	Tuba1a		Ddx26b
		Pcyox1	Tymp		Des
		Pde7a	Ubxn10		Dhcr24
		Pdlim2	Ubxn11		Diras2
		Pdzd2	Ulk4		Dis3l2
		Pdzk1ip1	Vwa3a		Dixdc1
		Pgap1	Wdr27		Dlec1
		Pgd	Wdr38		Dmbt1
		Phf11b	Wdr63		Dmkn
		Phgdh	Wdr78		Dmwd
		Phlda3	Wdr93		Dnaaf1
		Piga	Wdr95		Dnaaf3
		Pik3ap1	Wnt11		Dnaaf5
		Pik3r5	Wnt5b		Dnah1
		Pim1	Xylb		Dnah10
		Pira6	Zmynd10		Dnah11
		Pirb	Zmynd12		Dnah2
		Pkp1	Zscan18		Dnah5
		Pla2g15			Dnah6
		Plat			Dnah7a
		Plcb2			Dnah7b
		Plcd1			Dnah9
		Pld3			Dnaic1
		Pld4			Dnaic2
		Plekhm1			Dnajb13
		Plekho2			Dnal1
		Plin2			Dnal4
		Plod2			Dnali1
		Pmm1			Dock9
		Pnpla7			Dpp6
		Ppp1r18			Dpy30
		Prkcd			Drc1
		Prkch			Drc7
		Prom2			Dthd1
		Prps2			Dtna
		Prss23			Dtx1
		Prss32			Dusp14
		Prune2			Dusp18
		Psap			Dydc1
		Psat1			Dydc2
		Psmb10			Dync2h1
		Psmb8			Dync2li1
		Psmb9			Dynlrb2
		Psme2b			Dyx1c1
		Psrc1			Dzank1
		Ptgr1			Dzip1
		Ptn			Dzip1l
		Ptp4a3			E030044B06Rik
		Ptpre			E230008N13Rik
		Pvrl1			E230019M04Rik
		Pvrl4			E2f5
		Pycard			Ect2l
		Rab25			Efcab1
		Rab27a			Efcab10
		Rab38			Efcab11
		Rab3d			Efcab12
		Ralbp1			Efcab2
		Rap2b			Efcab6
		Rapgefl1			Efcab7
		Rassf5			Efhb
		Rbp1			Efhc1
		Rcn1			Elmod1
		Rdh12			Eml1
		Reps2			Eml2
		Rftn1			Eml5
		Rhbg			Enah
		Rin3			Endog
		Rnasel			Enkur
		Rnf144b			Eno3
		Rnf26			Eno4
		Rpl13a			Ephx4
		Rpl18			Erich3
		Rpl19			Esyt3
		Rpl27a			Etnk1
		Rpl28			F2
		Rpl3			F5
		Rplp0			Fads1
		Rplp2			Fads3
		Rps11			Fam107a
		Rps5			Fam117a
		Rps9			Fam13a
		Rrm1			Fam149a
		S100a14			Fam151b
		S100a16			Fam154b
		Samd14			Fam159a
		Samhd1			Fam161b
		Scel			Fam166b
		Sdc3			Fam167a
		Selplg			Fam171a1
		Sema4a			Fam179a
		Serpinb1a			Fam183b
		Sesn2			Fam187b
		Sgk1			Fam188b
		Sgpl1			Fam213a
		Sh2d4a			Fam216a
		Sh3pxd2a			Fam216b
		Sh3rf2			Fam227a
		Sidt2			Fam47e
		Siglec1			Fam73a
		Slc27a3			Fam81a
		Slc27a4			Fam83e
		Slc29a3			Fam84b
		Slc35a4			Fam92b
		Slc39a4			Fank1
		Slc39a8			Fbxl13
		Slc44a2			Fbxl2
		Slc9a4			Fbxo16
		Slco2a1			Fbxo17
		Slfn2			Fbxo36
		Snrk			Fdft1
		Snx24			Fdps
		Snx30			Fhad1
		Sp6			Fhit
		Spc24			Fhl1
		Spns2			Firre
		St3gal4			Flt3l
		Stk39			Fmo1
		Stmn1			Fmo3
		Styk1			Fn3k
		Sulf2			Fndc5
		Suox			Foxj1
		Syt8			Fsd1l
		Tacstd2			Fsip1
		Taldo1			Fstl4
		Tanc1			Fut9
		Taok3			Fzd4
		Tap1			Gabre
		Tapbp			Galk1
		Tbx2			Gas2l2
		Tgfb1			Gata6
		Tgfbi			Gck
		Tgm1			Gde1
		Tgm2			Gfpt2
		Themis2			Gfra1
		Timp2			Ggt6
		Tlr13			Gipc2
		Tlr2			Glb1l2
		Tlr5			Glt8d1
		Tmco4			Gm10415
		Tmem140			Gm11517
		Tmem229b			Gm11992
		Tmem40			Gm12695
		Tmem79			Gm16130
		Tmprss4			Gm1661
		Tmsb4x			Gm17019
		Tmtc2			Gm19461
		Tnfrsf1b			Gm3317
		Tns1			Gm3488
		Tpp1			Gm5069
		Trim29			Gm867
		Trim32			Gm973
		Trp53			Gm9758
		Trp63			Gmnn
		Tspan15			Gnal
		Ttyh2			Gng7
		Ttyh3			Golt1a
		Tubb5			Gpd1
		Ugt1a7c			Gpr125
		Unc5a			Gpr37
		Unc5b			Gpr98
		Upk1b			Gramd1c
		Upk3bl			Grb14
		Uqcrc1			Hacl1
		Ust			Hdc
		Vat1			Heg1
		Vav1			Hepacam
		Vav3			Hey1
		Vim			Hhatl
		Vps18			Hltf
		Wdr81			Hnmt
		Wfdc18			Hp
		Wnt10a			Hpse
		Wnt4			Hrc
		Xdh			Hsf2
		Ybx3			Hspb11
		Zeb2			Hspb6
		Zfp185			Hydin
		Zfp385a			Idi1
		Zmat3			Ift122
					Ift140
					Ift172
					Ift43
					Ift46
					Ift57
					Ift74
					Ift81
					Ift88
					Igdcc4
					Igsf11
					Igsf5
					Inca1
					Inhbb
					Inpp4a
					Insig1
					Intu
					Iqca
					Iqcd
					Iqce
					Iqcg
					Iqch
					Iqck
					Iqub
					Itga7
					Itpka
					Jam2
					Jam3
					Jazf1
					Kcne3
					Kcnh2
					Kcnh3
					Kcnj11
					Kcnmb1
					Kcnmb2
					Kcnq1
					Kcnrg
					Kif19a
					Kif26b
					Kif27
					Kif6
					Kif9
					Kifap3
					Kiz
					Klf15
					Klhl7
					Klk11
					Klkb1
					Klrg2
					Kndc1
					Krt83
					Ky
					Lbh
					Lca5
					Lca5l
					Lclat1
					Ldb3
					Ldlrad1
					Lekr1
					Lgr6
					Lhb
					Lmln
					Lpar3
					Lpgat1
					Lrguk
					Lrig1
					Lrp11
					Lrp2bp
					Lrrc10b
					Lrrc18
					Lrrc23
					Lrrc34
					Lrrc36
					Lrrc43
					Lrrc45
					Lrrc46
					Lrrc48
					Lrrc49
					Lrrc51
					Lrrc56
					Lrrc6
					Lrrc71
					Lrrc74b
					Lrriq1
					Lrriq3
					Lrwd1
					Lyz2
					Maats1
					Macrod1
					Mak
					Mamdc2
					Map10
					Map1b
					Map3k12
					Map3k19
					Map9
					Mapk15
					Mapkbp1
					Mat1a
					Mcee
					Mcf2l
					Mdh1b
					Medag
					Megf6
					Meig1
					Metrn
					Mettl20
					Mfsd6l
					Mipep
					Mkx
					Mlf1
					Mok
					Morn1
					Morn3
					Morn5
					Mr1
					Mrps17
					Msh5
					Msl3l2
					Msmo1
					Msrb2
					Mxra8
					Mycbp
					Mycbpap
					Myl9
					Myo1h
					Naf1
					Nap1l3
					Nat9
					Nek1
					Nek10
					Nek11
					Nek2
					Nek5
					Neurl1a
					Nexn
					Nhlrc4
					Nme5
					Nme7
					Nme9
					Nphp4
					Nr1d2
					Nr1i2
					Nrxn2
					Nsun7
					Nudt11
					Nup210l
					Nwd1
					Oaz2
					Odc1
					Odf2l
					Odf3b
					Ogg1
					Olig3
					Osbpl3
					Osbpl6
					Oscp1
					P2rx6
					P4htm
					Pacrg
					Pcp4l1
					Pcsk4
					Pdia2
					Pdlim3
					Per3
					Pex7
					Pgm2l1
					Phkg1
					Phtf1
					Pifo
					Pigr
					Pih1d2
					Pitpnm3
					Pklr
					Plch1
					Plekhb1
					Plin5
					Plk5
					Pltp
					Plxnb3
					Pon1
					Porcn
					Ppifos
					Ppil6
					Ppp1r1b
					Ppp1r32
					Ppp1r36
					Ppp1r42
					Pramef12
					Prepl
					Prkar2b
					Proc
					Prodh
					Prr15
					Prr36
					Prrg3
					Psmc3ip
					Ptpn20
					Ptprm
					Ptprn2
					Ptprz1
					Pts
					Pxmp2
					Rab23
					Rab36
					Rabgap1l
					Rabl2
					Rap1gap
					Rasef
					Rasl10b
					Rbpms2
					Rd3
					Rfx3
					Rgs11
					Rgs14
					Rgs22
					Rhpn1
					Ribc1
					Ribc2
					Ric3
					Riiad1
					Rnase4
					Rnf128
					Rnf24
					Ropn1l
					Rp1
					Rpgr
					Rpgrip1l
					Rph3al
					Rptoros
					Rsph1
					Rsph14
					Rsph4a
					Rsph9
					Rxfp2
					S100b
					Samd4
					Scgb1a1
					Scgb3a1
					Scgb3a2
					Scn3b
					Scn5a
					Sco2
					Scrn1
					Sec14l3
					Sec14l4
					Sema3e
					Serpina9
					Serpinb12
					Serpinb1b
					Sftpa1
					Sftpb
					Sftpc
					Sfxn5
					Sh3rf3
					Shank2
					Shank3
					Sipa1l2
					Sirt3
					Six5
					Slc12a7
					Slc14a1
					Slc16a12
					Slc16a3
					Slc1a4
					Slc1a5
					Slc23a1
					Slc23a2
					Slc24a3
					Slc25a14
					Slc25a17
					Slc25a18
					Slc25a23
					Slc2a10
					Slc2a12
					Slc35g2
					Slc35g3
					Slc39a6
					Slc4a5
					Slc4a8
					Slc5a8
					Slc7a4
					Smim5
					Smtnl2
					Sntn
					Snx25
					Spa17
					Spag16
					Spag17
					Spag6
					Spag8
					Spata17
					Spata18
					Spata24
					Spata7
					Speer4d
					Speer4e
					Spef1
					Spef2
					Spice1
					Sqle
					St3gal6
					St8sia2
					Stard4
					Stard8
					Stc2
					Stk33
					Stk36
					Stmnd1
					Stox1
					Stpg1
					Strbp
					Stx2
					Sult1c1
					Sybu
					Syne1
					Syne2
					Syngap1
					Syt5
					T2
					Tacr1
					Taf1a
					Tasp1
					Tbata
					Tbc1d19
					Tbc1d30
					Tbc1d32
					Tc2n
					Tcea3
					Tcp11
					Tcp11l2
					Tcte1
					Tctex1d4
					Tctn2
					Tctn3
					Tekt1
					Tekt2
					Tekt3
					Tekt4
					Tenm4
					Tex26
					Tex9
					Tgfbr3
					Timp4
					Tm4sf1
					Tm6sf2
					Tmem107
					Tmem17
					Tmem213
					Tmem216
					Tmem220
					Tmem231
					Tmem232
					Tmem243
					Tmem37
					Tmem38a
					Tmem67
					Tmtc1
					Tnni3
					Tppp3
					Tpsb2
					Traf3ip1
					Triqk
					Trp73
					Trpm4
					Tsga10
					Tsku
					Tsnaxip1
					Tspan13
					Tspan3
					Tspan33
					Tspyl5
					Ttc12
					Ttc16
					Ttc21a
					Ttc25
					Ttc26
					Ttc29
					Ttc30a1
					Ttc30b
					Ttc34
					Ttc39c
					Ttc5
					Ttc8
					Ttll10
					Ttll13
					Ttll3
					Ttll6
					Ttll8
					Ttll9
					Tuba1a
					Tubgcp3
					Tulp3
					Tusc3
					Txnrd3
					Tymp
					Ubxn10
					Ubxn11
					Uckl1os
					Ugt8a
					Ulk2
					Ulk4
					Unc79
					Uox
					Vldlr
					Vpreb3
					Vwa3a
					Wdpcp
					Wdr19
					Wdr27
					Wdr31
					Wdr34
					Wdr35
					Wdr38
					Wdr54
					Wdr60
					Wdr63
					Wdr78
					Wdr93
					Wdr95
					Wnt11
					Wnt5b
					Wrb
					Wwox
					Xrra1
					Xylb
					Zbbx
					Zc2hc1a
					Zc2hc1c
					Zc3h6
					Zdhhc1
					Zfand4
					Zfp14
					Zfp334
					Zfp474
					Zfyve28
					Zmynd10
					Zmynd12
					Zscan18

## Sheet: Table S4
Table S4. Mouse genes downregulated as early as T2 vs T0 and enriched in airways of human smokers with lung cancer relative to cancer-free smokers
Gene
ARHGDIB
AXL
GBP2
CPT1C
MUC20
CD300C
HIP1
NBEAL2
CWH43
DEF6
CD53
IGSF6
C10orf54
ABCA1
LRP1
HOMER3
PPP1R18
GRIA3
IL1RN
CD68
MMP14
CAPG

## Sheet: Table S5
Table S5. Pathways analysis of Mouse genes enriched in airways of human smokers with lung cancer and modulated during in vivo lung oncogenesis
Pathway enriched	p-value	adjusted p-value	z-score	combined score
inflammatory response (GO:0006954)	7.588e-07	0.001162	-2.38	16.1
taxis (GO:0042330)	7.123e-06	0.001283	-2.39	15.9
chemotaxis (GO:0006935)	7.123e-06	0.001283	-2.39	15.89
organelle fission (GO:0048285)	7.036e-06	0.001283	-2.34	15.56
nuclear division (GO:0000280)	3.161e-06	0.00125	-2.31	15.45
mitotic nuclear division (GO:0007076)	3.266e-06	0.00125	-2.27	15.19
leukocyte migration (GO:0050900)	1.948e-06	0.00125	-2.27	15.16
cell chemotaxis (GO:0060326)	7.54e-06	0.001283	-2.24	14.89
regulation of mitosis (GO:0007088)	8.86e-06	0.001356	-2.24	14.78
leukocyte chemotaxis (GO:0030595)	4.379e-06	0.001283	-2.18	14.55
